# Supplementary material for: Spatial and temporal variations in surface snow chemistry along a traverse from Dome C toward South Pole in the framework of East Antarctic International Ice Sheet Traverse (EAIIST) project
Source: Copernicus journal article supplement (doi:10.5194/egusphere-2023-393), 2023-04-26
Supplement: Supplementary file 1 [file egusphere-2023-393-supplement.pdf]

## SUPPLEMENTARY MATERIAL

### **Spatial and temporal variations in surface snow chemistry along a traverse from Dome C toward South Pole in the framework of East Antarctic International Ice Sheet Traverse (EAIIST) project.**

Simone Ventisette<sup>1</sup>, Samuele Baldini<sup>1</sup>, Claudio Artoni<sup>2</sup>, Silvia Becagli<sup>1,3</sup>, Laura Caiazzo<sup>1,4</sup>, Barbara Delmonte<sup>2</sup>, Massimo Frezzotti<sup>5</sup>, Raffaello Nardin<sup>1</sup>, Joel Savarino<sup>6</sup>, Mirko Severi<sup>1,3</sup>, Andrea Spolaor<sup>3</sup>, Barbara Stenni<sup>7</sup>, and Rita Traversi<sup>1,3</sup>.

<sup>1</sup>Department of Chemistry “Ugo Schiff”, University of Florence, Sesto Fiorentino, Florence I-50019, Italy

<sup>2</sup>Department of Environmental Science, University of Milano-Bicocca, Milan, Italy

<sup>3</sup>Institute of Polar Sciences, ISP-CNR, University of Venice, V. Torino 155, 30172 Venice-Mestre, Italy

<sup>4</sup>Laboratory for Observations and Measurements for Environment and Climate (SSPT-PROTER-OEM), ENEA C.R. Casaccia, 00123, Roma, Italy

<sup>5</sup>Department of Science, University of Roma Tre, Largo S. Leonardo Murialdo, 1, 00146, Roma, Italy.

<sup>6</sup>Institut des Géosciences de l’Environnement, Université Grenoble Alpes, CNRS, IRD, Grenoble INP, 38400 Grenoble, France

<sup>7</sup>Ca’Foscari University of Venice, Department of Environmental Sciences, Informatics and Statistics, Via Torino 155, 30172 Venice Mestre, Italy.

*Correspondence to:* Silvia Becagli (silvia.becagli@unifi.it)

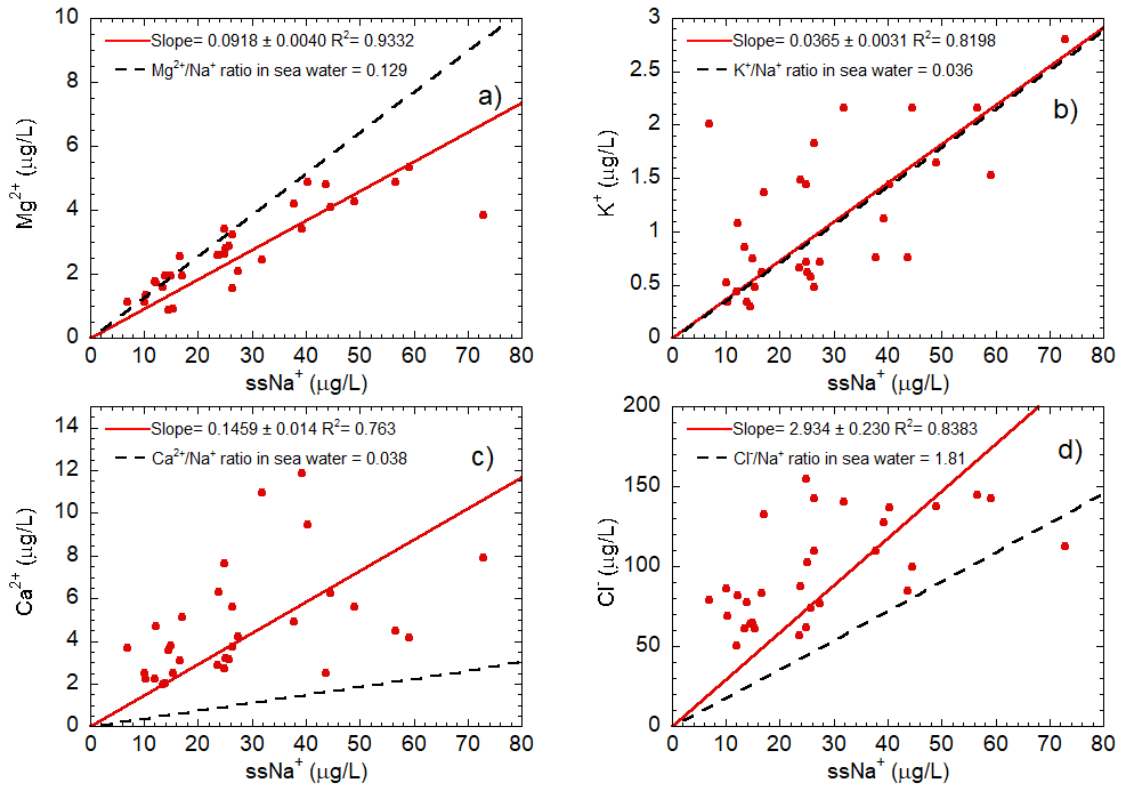

**Figure 1S.** Scatter plot of  $Mg^{2+}$ ,  $K^+$ ,  $Ca^{2+}$  and  $Cl^-$  vs.  $ssNa^+$  in the superficial snow. Red line is the regression line forced to 0;0 point. Slope  $\pm$  slope error and  $R^2$  are reported in each plot. Black dotted lines represents the mean sea water ratio of each ions respect to  $Na^+$  (Bowen 1979).

**Table 1S.** Geographical characteristic and sampling in each site. SS= superficial snow; SP=snow pit

| Site              | Distance from DC (km) | Lat South (°) | Long Est (°) | Altitude (m) | Distance from Indian Ocean (km) | Distance from Ross Sea (km) | Type of sampling |
|-------------------|-----------------------|---------------|--------------|--------------|---------------------------------|-----------------------------|------------------|
| <b>Dome C</b>     | 0                     | 75.099        | 123.332      | 3269         | 930                             | 1082                        |                  |
| <b>1</b>          | 18                    | 75.262        | 123.315      | 3264         | 948                             | 1074                        | SS               |
| <b>2</b>          | 40                    | 75.459        | 123.288      | 3254         | 968                             | 1065                        | SS               |
| <b>3</b>          | 92                    | 75.715        | 123.208      | 3232         | 994                             | 1056                        | SS               |
| <b>4</b>          | 89                    | 75.903        | 123.272      | 3215         | 1017                            | 1046                        | SS               |
| <b>5</b>          | 107                   | 76.065        | 123.306      | 3202         | 1036                            | 1039                        | SS               |
| <b>6</b>          | 130                   | 76.272        | 123.335      | 3180         | 1058                            | 1030                        | SS               |
| <b>7</b>          | 151                   | 76.459        | 123.363      | 3165         | 1079                            | 1014                        | SS               |
| <b>8</b>          | 172                   | 76.642        | 123.386      | 3160         | 1099                            | 1005                        | SS               |
| <b>9</b>          | 194                   | 76.841        | 123.419      | 3149         | 1121                            | 994                         | SS               |
| <b>10</b>         | 218                   | 77.061        | 123.451      | 3131         | 1146                            | 985                         | SS               |
| <b>11 (AGO-5)</b> | 238                   | 77.238        | 123.476      | 3124         | 1165                            | 978                         | SS and SP        |
| <b>12</b>         | 258                   | 77.414        | 123.647      | 3115         | 1187                            | 968                         | SS               |
| <b>13</b>         | 279                   | 77.602        | 123.848      | 3108         | 1208                            | 957                         | SS               |
| <b>14</b>         | 299                   | 77.780        | 124.024      | 3097         | 1228                            | 947                         | SS               |
| <b>15</b>         | 320                   | 77.972        | 124.232      | 3083         | 1250                            | 934                         | SS               |
| <b>16</b>         | 341                   | 78.157        | 124.431      | 3071         | 1272                            | 924                         | SS               |
| <b>17</b>         | 362                   | 78.348        | 124.476      | 3053         | 1293                            | 919                         | SS               |
| <b>18</b>         | 382                   | 78.517        | 124.822      | 3034         | 1310                            | 907                         | SS               |
| <b>19</b>         | 402                   | 78.692        | 125.020      | 3013         | 1332                            | 899                         | SS               |
| <b>20</b>         | 421                   | 78.861        | 125.205      | 2988         | 1351                            | 892                         | SS               |
| <b>21</b>         | 444                   | 79.067        | 125.449      | 2963         | 1374                            | 881                         | SS               |
| <b>22</b>         | 468                   | 79.279        | 125.690      | 2935         | 1398                            | 873                         | SS               |
| <b>23</b>         | 489                   | 79.464        | 125.920      | 2918         | 1420                            | 865                         | SS               |
| <b>24 (PALEO)</b> | 510                   | 79.646        | 126.137      | 2903         | 1440                            | 859                         | SS and SP        |
| <b>25</b>         | 524                   | 79.781        | 125.711      | 2904         | 1452                            | 866                         | SS               |
| <b>26</b>         | 539                   | 79.926        | 125.231      | 2910         | 1467                            | 875                         | SS               |
| <b>27</b>         | 552                   | 80.050        | 124.810      | 2909         | 1479                            | 882                         | SS               |
| <b>28</b>         | 572                   | 80.240        | 124.166      | 2923         | 1499                            | 893                         | SS               |
| <b>29</b>         | 594                   | 80.439        | 123.466      | 2941         | 1520                            | 906                         | SS               |
| <b>30</b>         | 614                   | 80.620        | 122.830      | 2964         | 1539                            | 917                         | SS               |
| <b>31 (WCru)</b>  | 625                   | 80.716        | 122.171      | 2981         | 1549                            | 928                         | SS and SP        |
| <b>32 (MGD)</b>   | 610                   | 80.571        | 121.643      | 3001         | 1532                            | 939                         | SS               |
| <b>MGD-A</b>      | 610                   | 80.578        | 121.643      | 3001         | 1526                            | 947                         | SP               |
| <b>MGD-E</b>      | 610                   | 80.571        | 121.799      | 2996         | 1531                            | 944                         | SP               |
